23 **Ajishnu Roy:** Conceptualization, Methodology, Data curation, Analysis, Visualization,  
24 Interpretation, Writing - original draft, review & editing.

25 **Aman Basu:** Formal analysis, Visualization, Writing - review & editing.

26 **Kousik Pramanick:** Writing – review, Guidance.

27 **Abstract:**

28 Coronavirus (SARS Covid-19) has become a global public health concern due to its  
29 unpredictable nature and lack of adequate pre-existing conditions. Achievement of WASH  
30 services is being acknowledged as indispensable in safeguarding health. However, on a global  
31 scale, it is currently not clear whether deprivation or non-obtainability of which of the factors are  
32 closely related to Covid-19 dynamics and up to which degree. We have analysed 6 months' data  
33 related to five Covid-19 indicators for most of the countries in the world with three groups of  
34 indicators of WASH, socio-economic factors and mobility & stringency. Four successive steps  
35 were followed to carry out the analysis: (a) identification of relevant key explanatory variables of  
36 Covid-19, (b) identification of indicators (n=103) for other 5 sub-groups of factors (viz. WASH,  
37 economy, health, society, mobility & stringency) through literature review, (c) utilizing  
38 Spearman's rank-order correlation for measuring the association of the possible explanatory  
39 variables with those of Covid-19 (of spatial nature), and then (d) continuing the same for 6  
40 consecutive months (from March to August 2020) until we get an almost unchanging trend. We  
41 have found a strong positive correlation between lesser effects (i.e. either less confirmed case or  
42 higher recovery rate) of Covid-19 and better access to WASH as well as socioeconomic factors  
43 throughout this time for a significant amount of the indicators. Since a handful of research is  
44 available to discuss the association between Covid-19 with other probable determinants along  
45 with the nature and degree of their relationship, this study should be perceived as an expanded

46 view on the complexities of Covid-19 interrelationships towards understanding determinants of  
47 Covid-19 dynamics, which could help to shape an agenda for research into some unanswered  
48 questions.

49 **Keywords:** socioeconomy; WASH; stringency; mobility; covid-19; global;

## 50 **1. Introduction:**

51 Severe acute respiratory syndrome-coronavirus (SARS-CoV-2), emerged in China in December  
52 2019, is causing an outbreak of respiratory disease (COVID-19 disease by WHO). The new  
53 SARS-CoV-2 virus is known to spread by person-to-person contact (through respiratory droplets  
54 over a short distance) or via faecal-oral routes (hypothesised by Heller et al. 2020). Studies have  
55 shown that coronaviruses exist and can maintain their viability in sewage and hospital  
56 wastewater, originating from the faecal discharge of infected patients. Concerns have been raised  
57 over inequity in access to various prevention and control measures for slum dwellers, refugees  
58 etc. (Singh et al. 2020), even though Tedros Adhanom Ghebreyesus (DG, WHO) has urged a  
59 “whole-of-government, whole-of-society approach” for Covid-19 (Lau et al. 2020). According to  
60 Lau et al. (2020), one of the important reasons for this might be limited access to safe water and  
61 sanitation. Connection of control of covid-19 and global access to handwashing facilities has also  
62 been established for low-income countries (Brauer et al. 2020). The insecurity of water may also  
63 act as a deterrent for covid-19 mitigation, especially in developing areas (Stoler et al., 2020).  
64 Odith et al. (2020) have also emphasized probable induction of Covid-19 transmission rate from  
65 the shortfall in water and sanitation, using Nigeria as a case study. Amankwaa & Fischer (2020)  
66 and Jiwani & Antiporta (2020) have also emphasised on the effects of poor WASH services on  
67 Covid-19 fatalities in sub-Saharan African countries. Caruso & Freeman (2020) have argued on  
68 the effects of inequality of sanitation facility with relation to the spread of Covid-19. Mushi &

69 Shao (2020) have stated the possible role of WASH services regarding the prevention of the  
70 further spread of covid-19, especially for lower- and middle-income countries. Ray (2020) have  
71 opined on the importance of hygiene about Covid-19. All of these works indicate a possible  
72 significant level of connection between inequality of WASH services and Covid-19. WHO and  
73 UNICEF have long been suggested about the importance of WASH in itself (UNICEF 2019) and  
74 also related to Covid-19 (WHO, 2020 a, b). Thus, these works indicate towards shortfalls WASH  
75 may relate to higher Covid-19 (occurrence and transmission).

76 Some socio-economic and demographic parameters were closely associated with COVID-19  
77 cases-fatality rate. These include - per capita gross national income, net migration, voters' turnout  
78 ratio for Asian countries (Varkey et al. 2020), average age, the population density and density of  
79 doctors in Germany (Ehlert, 2020), tourism (Farzanegan et al. 2020; Lapointe, 2020; Gössling et  
80 al. 2020), household size, use of public transport, aged population and self-reported health for  
81 England and Wales (Sá, 2020), mean income in the 10 districts of the city of Barcelona – Spain  
82 (Baena-Díez et al., 2020), socioeconomic characteristics in neighbourhood community in 7 states  
83 of USA (Hatef et al., 2020), early life environment, life trajectory and socioeconomic status  
84 (Holuka et al. 2020), income and population density (Jani & Mavalankar, 2020), morbidity rate,  
85 risky health behaviours, crowding, and population mobility in South Korea (Weinstein et al.  
86 2020), poor healthcare infrastructure, high population and room density, and informal job  
87 markets in low-income countries (UN Habitat, 2020; Mishra et al., 2020), poverty and income  
88 inequality in ten Latin America and the Caribbean (LAC) cities (Bolaño-Ortiz et al., 2020),  
89 working age population (i.e. demographic composition) in Italy and South Korea (Dowd et al.,  
90 2020), total population, poverty and income for some of the 31 countries in Europe (Sannigrahi  
91 et al., 2020), population, GDP and population density for Wuhan, China (Xiong et al., 2020) etc.

92 These studies indicate a varied relationship between social, economic, demographic influencing  
93 factors and Covid-19.

94 Apart from these, there are, at least 2 groups of real-time indicators which are supposed to have  
95 intervened with the dynamic of Covid-19, one is government measures through lockdowns and  
96 containment protocols and another is people's daily behaviour and activities. First, has mostly  
97 been interpreted through Oxford COVID-19 Government Response Tracker (OxCGRT) (Hale et  
98 al. 2020) and the second through Google community mobility reports (Google, 2020). Some  
99 works have suggested in support of their association with Covid-19 (Carlitz and Makhura, 2020;  
100 Castex et al., 2020; Yang et al., 2020).

101 There are some drawbacks to these works. Either some studies have incorporated a selectively  
102 few arrays of indicators, or their operational boundary is one or a group of countries of a region.  
103 Also, most of them deal with Covid-19 dataset of one single date, whereas it is well known that  
104 various parameters of this pandemic are very spatiotemporally dynamic i.e., changing with time  
105 as well as space (Sahin et al., 2020). For these reasons, we have conceptualized this work.

## 106 **2. Research Questions:**

107 There are some features that we have tried to encapsulate in this study.

108 (a) Are the various indicators of Covid-19 and indicators of WASH-related, at the global  
109 scale?

110 (b) If they are related, how much is their degree of association?

111 (c) Does their relationship remain similar throughout Covid-19 pandemic? i.e. Do the  
112 WASH conditions are affecting covid-19 conditions similarly from the onset of the  
113 pandemic?

- 114 (d) If the effect of WASH on indicators of Covid-19 have decreased over time, then what  
115 about other socioeconomic factors?
- 116 (e) Are the various indicators of socioeconomic dimensions and indicators of WASH-related,  
117 at the global scale?
- 118 (f) If socioeconomic factors and Covid-19 are related, how much is their degree of  
119 association?
- 120 (g) Do the socioeconomic factors are affecting covid-19 conditions similarly from the onset  
121 of the pandemic?
- 122 (h) If the effects of socioeconomic factors (excluding WASH) on indicators of Covid-19  
123 have decreased over time, then what about stringency and mobility factors?
- 124 (i) If the stringency and mobility factors are related to Covid-19, how much is their degree  
125 of association?
- 126 (j) Do the stringency and mobility factors affect covid-19 conditions similarly from the onset  
127 of the pandemic?

### 128 **3. Method and data:**

129 We have collected data of water, sanitation and hygiene from WHO/UNICEF JMP (2017)  
130 dataset and WDI (2020). We have used the data from the latest available year in this work. These  
131 set of indicators have been used as indicators of socioeconomic status following the framework  
132 used by Roy and Pramanick (2019). We have collected data of Covid-19 from for 6 different  
133 dates (30<sup>th</sup> of March to 30<sup>th</sup> August, 2020) from JHU CCSE (2020). We have used data for 5  
134 dimensions of water, 5 dimensions of sanitation, 3 dimensions of hygiene (i.e. 63 indicators of  
135 WASH, suppl. table 1-3) and 5 dimensions (with 5 indicators) of Covid-19. Also, we have used  
136 data for 21 dimensions (via 33 indicators) of socio-economy (except – WASH, suppl. table 4)

137 and 2 dimensions (with 7 indicators, suppl. table 5) of stringency and mobility. List of indicators  
138 is given in table 1. More details about sub-indicators are provided in the supplementary file.

139 The statistical analysis has been conducted using R 3.6.2, (R Core Team. 2019) and ‘Hmisc’ (v.  
140 4.4-0) package for performing correlation. Data for worldwide coronavirus cases are taken from  
141 package ‘coronavirus’ (v. 0.2.0) from Johns Hopkins University Center for Systems Science and  
142 Engineering (JHU CCSE) Coronavirus repository and analysed for cumulative cases for 6  
143 different dates of consecutive 6 months (30-03-2020, 30-04-2020, 30-05-2020, 30-06-2020, 30-  
144 07-2020 and 30-08-2020). Though this Covi-19 pandemic started in 31<sup>st</sup> Dec. 2019, we have  
145 taken up March as our starting phase of consideration. Because, the spread of the SARS-CoV2  
146 virus is asymmetrical for the countries of the world, and we can see that from March-April 2020,  
147 it had spread to most of the countries of the world with varying degree. We have also selected  
148 the span of the duration of study as 6 months (March-August, 2020), because – we think if  
149 nothing severely disturbs the dynamics of pandemic (as we can see so far, Nov. 2020), six  
150 months is sufficient to convey information about changing influence of various factors (WASH  
151 or others) on Covid-19 pandemic. Spearman’s rank-order correlation has been used for finding  
152 the association between the variables because the data is not normally distributed. Datasets, used  
153 for analysis, is provided in the supplementary files.

154 Table 1: List of indicators used related to various dimensions & Covid-19. (See suppl. file for  
155 calculation formula used for RR & CFR)

**Covid-19**

Total confirmed cases per million (TC),

Total recovered cases per million (TR),

|                                                                                                                                                                                                                                 |                                                                                                                                                                                                                                                                                                                                                                                              |                                                                                                                  |
|---------------------------------------------------------------------------------------------------------------------------------------------------------------------------------------------------------------------------------|----------------------------------------------------------------------------------------------------------------------------------------------------------------------------------------------------------------------------------------------------------------------------------------------------------------------------------------------------------------------------------------------|------------------------------------------------------------------------------------------------------------------|
| Total deaths per million (TD),<br>Recovery rate (RR),<br>Case fatality rate (CFR),                                                                                                                                              |                                                                                                                                                                                                                                                                                                                                                                                              |                                                                                                                  |
| <b>Socioeconomy of Water</b><br><br>Unimproved water services,<br>Limited water services (not<br>more than 30 min),<br>Basic drinking water<br>services,<br>Improved water source,<br>Safely managed drinking<br>water service, | <b>Socioeconomic dimensions</b><br><br>Connectivity,<br>Crude death rate,<br>Democracy,<br>Demography,<br>Employment,<br>Globalization,<br>Health expenditure,<br>Health personnel density,<br>Health security,<br>Human capital,<br>Human development,<br>Hunger,<br>Income,<br>Inequality,<br>Life expectancy,<br>Literacy,<br>Out-of-pocket expenditure<br>on health,<br>Social progress, | <b>Stringency and Mobility<br/>trends</b><br><br>Change in mobility,<br>Government Response<br>Stringency Index, |
| <b>Socioeconomy of Water</b><br><br>Unimproved water services,<br>Limited water services (not<br>more than 30 min),<br>Basic drinking water<br>services,<br>Improved water source,<br>Safely managed drinking<br>water service, | <b>Socioeconomy of Hygiene</b>                                                                                                                                                                                                                                                                                                                                                               |                                                                                                                  |



|                                                                                    |                                                   |  |
|------------------------------------------------------------------------------------|---------------------------------------------------|--|
| Basic handwashing facilities,<br>Limited handwashing facilities,<br>No facilities, | Tourism,<br>Urbanization,<br>WASH-related deaths, |  |
|------------------------------------------------------------------------------------|---------------------------------------------------|--|

156

157 **4. Results:**

158 **4.1. WASH and Covid-19:**

159 **4.1.1. Water and Covid-19:**

160 Most of the indicators that represent good socioeconomic condition related to water, like - basic  
161 drinking water, piped services, on-premises services, available when needed services, safely  
162 managed drinking water services etc. are strongly positively related to total confirmed, recovered  
163 and death. They show a lesser degree of positive correlation with recovery rate and case fatality  
164 rate. Another group of indicators that represent not so good socioeconomic condition related to  
165 water, like – non-piped services, unimproved water services, limited water services etc. have a  
166 strongly negative correlation to total confirmed, recovered and death. They show a lesser degree  
167 of negative correlation with recovery rate and case fatality rate.

168 However, if we delve deeper into each indicator, the see some apparent conflict in results, for all  
169 6 dates (i.e. total span under consideration of the study, 6 months), especially concerning total  
170 confirmed (TC) and total death (TD). Some of the indicators that represent good (BDWS) or  
171 better (IWS, IWS – P, IWS – AN, IWS - AP) conditions of safe and better access to water are

172 positively related to total confirmed and total death. Also, some of the indicators that represent  
173 poor (UWS, LWS) of safe and better access to water are negatively related to total death.

#### 174 **4.1.2. Sanitation and Covid-19:**

175 Most of the indicators that represent good socioeconomic condition related to sanitation, like –  
176 basic sanitation services, improved sanitation facilities, sewer connection facilities, wastewater  
177 treated facilities, septic tank facilities etc. are a higher degree of positive correlation to total  
178 confirmed, recovered and death. They show a lesser degree of positive correlation with recovery  
179 rate and even lesser with case fatality rate. Another group of indicators that represent not so good  
180 socioeconomic condition related to sanitation, like – limited sanitation facilities, open defecation,  
181 unimproved sanitation facilities etc. have a strongly negative correlation to total confirmed,  
182 recovered and death. They show a less strong negative correlation with recovery rate and even  
183 lesser with case fatality rate.

184 For all 6 dates (i.e. total span under consideration of the study, 6 months), some of the indicators  
185 that represent poor (OD, USF, LSF) conditions of safe and better access to sanitation facilities  
186 are negatively related to total death and confirmed. Also, indicators that represent good (BSS) or  
187 better (ISF, ISF – SC, ISF – ST, ISF – WT, ISF - SM) conditions of safe and better access to  
188 water are positively related to total confirmed and total death.

189 Indicators that depict poor (OD, USF, LSF) conditions of safe and better access to sanitation  
190 facilities are negatively related to CFR; whereas indicators that represent good (BSS) or better  
191 (ISF, ISF – SC, ISF – WT) conditions of safe and better access to water are positively related to  
192 CFR.

#### 193 **4.1.3. Hygiene and Covid-19:**

194 Basic handwashing facility has a higher degree of positive correlation to total confirmed,  
195 recovered, death and recovery rate. However, it has a lesser degree of positive correlation with  
196 the case fatality rate. Another group of hygiene indicator, that represent not so good  
197 socioeconomic condition, like – limited and no handwashing facilities have a higher degree of  
198 negative correlation with total confirmed, recovered, death and recovery rate. These have a lesser  
199 degree of negative correlation with the case fatality rate.

200 Indicators that represent good (BHF) conditions of safe and better access to hygiene facilities are  
201 positively correlated to total confirmed (TC) and total death (TD).

It is made available under a [CC-BY-ND 4.0 International license](https://creativecommons.org/licenses/by-nd/4.0/).

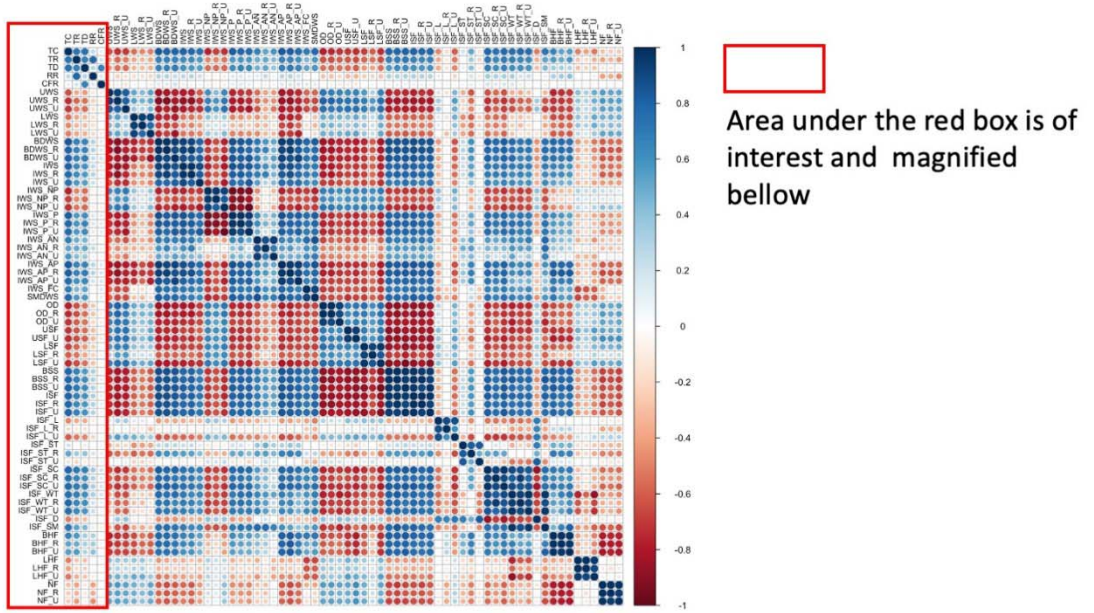

Area under the red box is of interest and magnified below

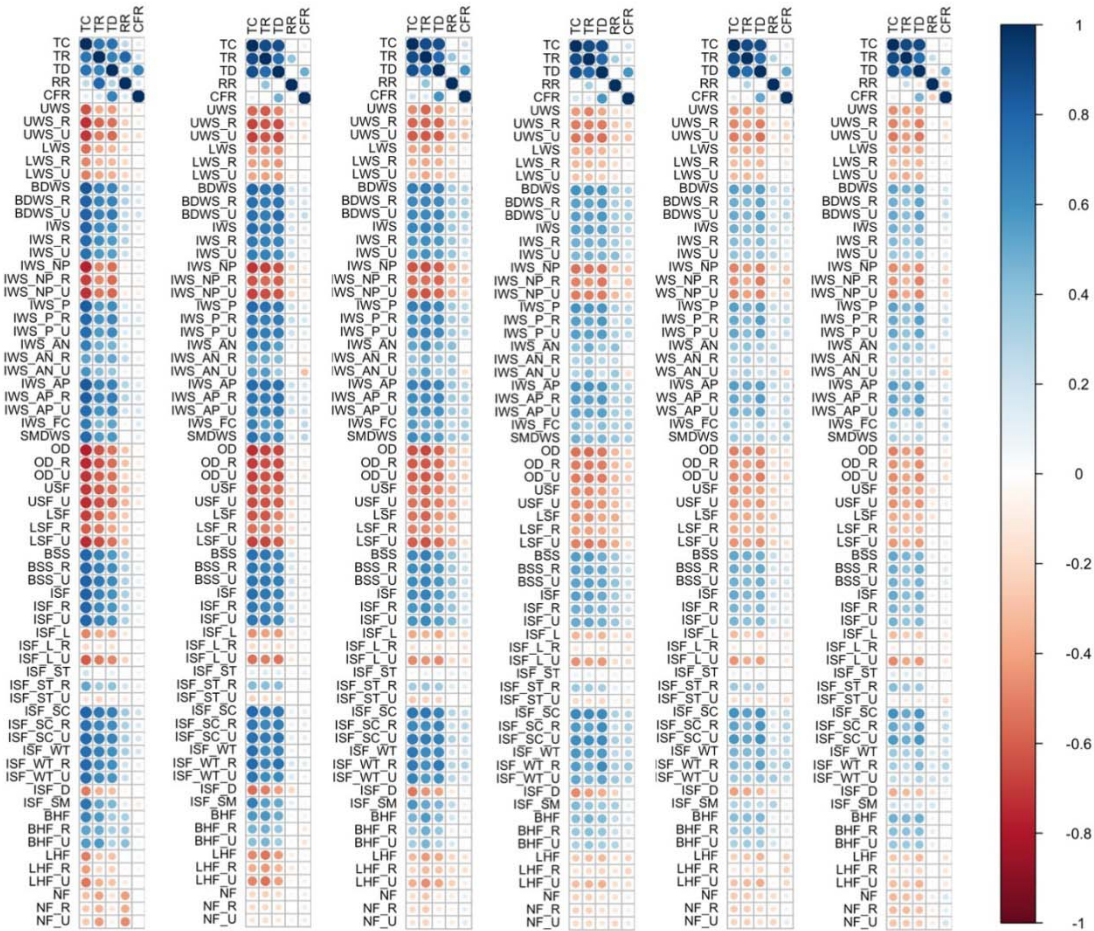

30-03-2020    30-04-2020    30-05-2020    30-06-2020    30-07-2020    30-08-2020

Decreasing overall correlation

203 Fig 1. Correlogram from Spearman's correlation of Covid-19 indicators (n=5) and indicators of  
204 water, sanitation and hygiene, WASH access (n=63) for countries (n=175) in the world (March-  
205 August, 2020).

206 The area marked in red box from the complete correlogram is the interest of this study. Hence,  
207 these selected portions, for 6 consecutive months have been displayed in the lower part of this  
208 figure.

#### 209 **4.1.4. Trends in WASH- Covid-19 relationships:**

210 We can see from Fig 1 that the level of correlation, be it either positive or negative, has  
211 decreased over time, i.e. from March to August 2020. This is similar to 3 indicators of Covid-19,  
212 namely – total confirmed, recovered and death. Especially, from June 2020 onwards, this is very  
213 distinct.

214 From the dendrogram (Suppl. Figure 1) of WASH-Covid-19, it is visible that there have 2  
215 distinct groups throughout the study, one with case fatality and recovery and another with total  
216 confirmed, recovered and death. Most of the indicators of WASH have remained polarized in  
217 heatmap i.e., indicators of good and bad WASH conditions have remained in two opposite  
218 correlation groups in case of one group (with total confirmed, recovered and death). But, for the  
219 other group (containing case fatality rate and recovery rate), this is not distinctly different related  
220 to WASH indicators.

#### 221 **4.2. Socioeconomic dimensions and Covid-19:**

222 This study has identified a few contributory elements which have exhibited high association with  
223 Covid-19 dynamics across the countries. Among health-related indicators, the share of health  
224 expenditure, health security, life expectancy, physician-nurse density and per capita out-of-

225 pocket health expenditure have a higher degree of positive correlation with total confirmed,  
226 recovered and death related to Covid-19. Two other health-related indicators have a lesser degree  
227 of positive correlation with the same, namely – per capita share of health expenditure and crude  
228 death rate. Share of per capita out-of-pocket health expenditure has a higher degree of negative  
229 correlation with the same 3 indicators related to Covid-19.

230 Among economy-related indicators, globalization, real GDP and connectedness have a higher  
231 degree of positive correlation with total confirmed, recovered and death related to Covid-19. But  
232 the Gini coefficient has a lesser degree of negative correlation with the same.

233 Among demographic indicators, the median age of the population and aged population have a  
234 higher degree of positive correlation than population density with total confirmed, recovered and  
235 death; whereas the total population is negatively correlated with them.

236 Among societal indicators, literacy rate, democracy level, human capital and development,  
237 international tourism arrival, the share of urban population and social progress have a higher  
238 degree of positive correlation than with total confirmed, recovered and death; whereas  
239 employment to population ratio, hunger level, the share of vulnerable employment,  
240 unemployment and prevalence of deaths from water, sanitation and handwashing facilities have a  
241 negative correlation with the same.



It is made available under a [CC-BY-ND 4.0 International license](https://creativecommons.org/licenses/by-nd/4.0/).

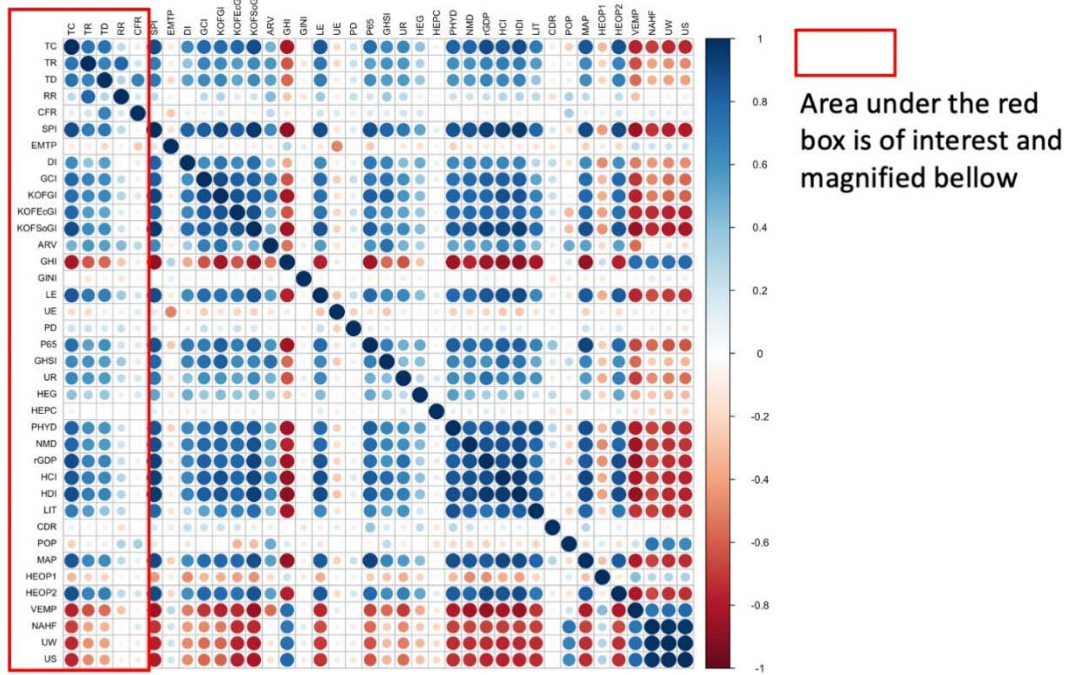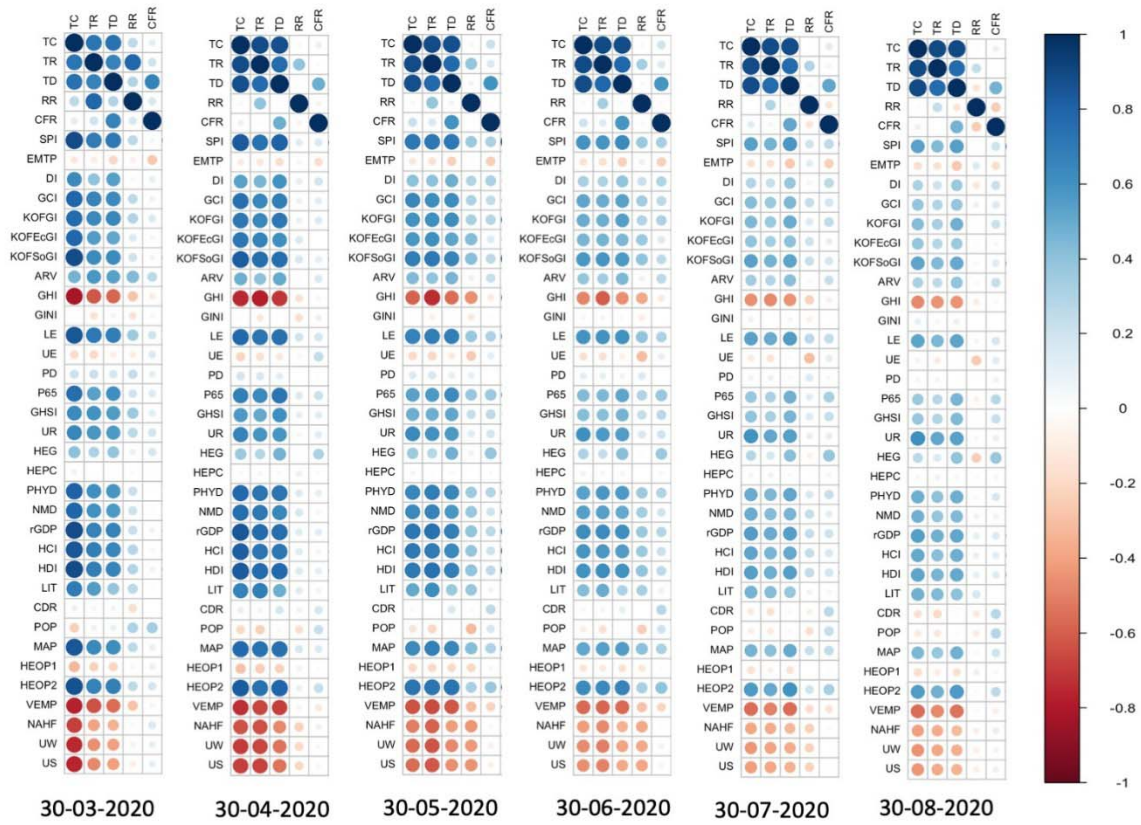

Decreasing overall correlation →

243 Fig 2. Correlogram from Spearman's correlation of Covid-19 indicators (n=5) and indicators of  
244 socio-economic situations (n=33) for countries (n=175) in the world (March-August, 2020).

245 The area marked in red box from the complete correlogram is the interest of this study. Hence,  
246 these selected portions, for 6 consecutive months have been displayed in the lower part of this  
247 figure.

#### 248 **4.2.1. Trends in Socioeconomy- Covid-19 relationship:**

249 From the dendrogram (Suppl. Figure 2) of socioeconomy-Covid-19, it is clearly visible that there  
250 have 2 distinct groups throughout the study, one with case fatality and recovery and another with  
251 the rest (i.e. total confirmed, recovered and death).

252 Mostly, the indicators of socioeconomic conditions have remained polarized in heatmap i.e.,  
253 indicators of improved and poor socioeconomic conditions have remained in two opposite  
254 correlation groups in case of one group (with total confirmed, recovered and death). But, for the  
255 other group (containing case fatality rate and recovery rate), this is not distinctly different related  
256 to socioeconomic indicators.

#### 257 **4.3. Stringency, mobility and Covid-19:**

258 Among these indicators, time spent in residential areas (i.e. Rsd) has a higher degree of positive  
259 correlation with total confirmed, recovered and death related to Covid-19, than stringency index  
260 (SnI). On the other hand, the density of visitors in workplaces (WkP), transit stations (TnS) and  
261 retail & recreation places (RnR) have a higher degree of negative correlation to those indicators  
262 of Covid-19, than the density of visitors in grocery, pharmacy (GnP) and parks (Pks). Primarily  
263 (i.e. March 2020), the case fatality rate is more correlated to these indicators than recovery rate,  
264 and both have a lesser degree of correlation than aforementioned 3 indicators regarding Covid-19.



265 Excluding the first month (March 2020), the recovery rate has been negatively correlated to  
266 stringency.

It is made available under a [CC-BY-ND 4.0 International license](https://creativecommons.org/licenses/by-nd/4.0/).

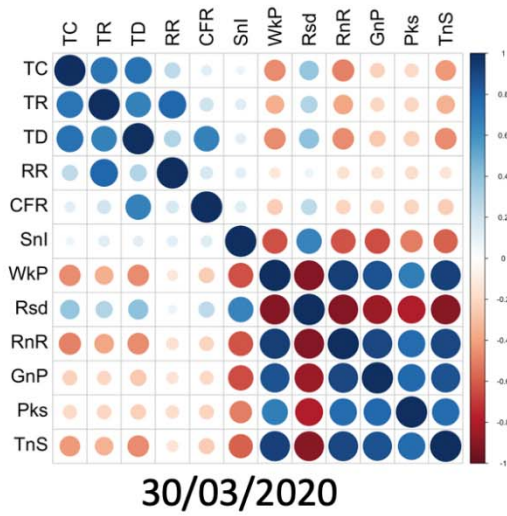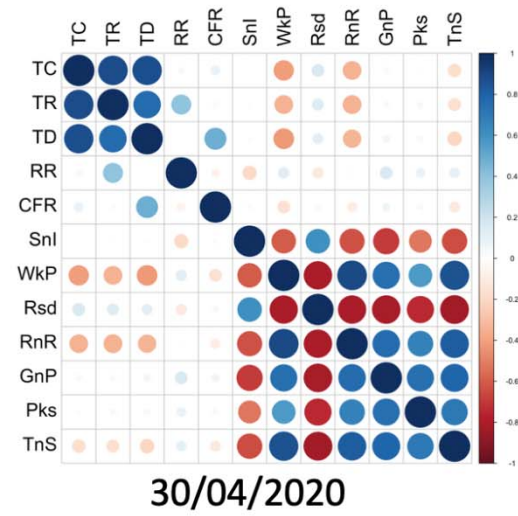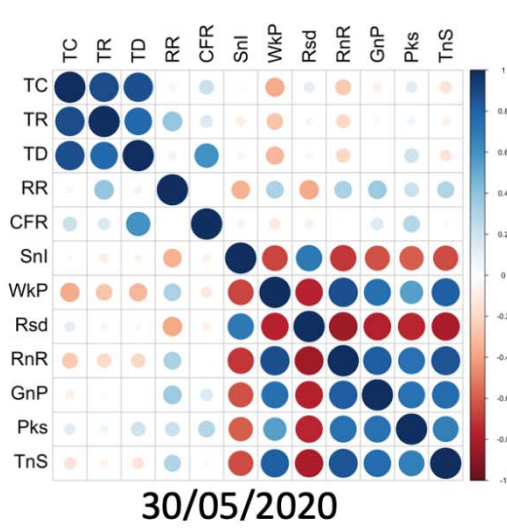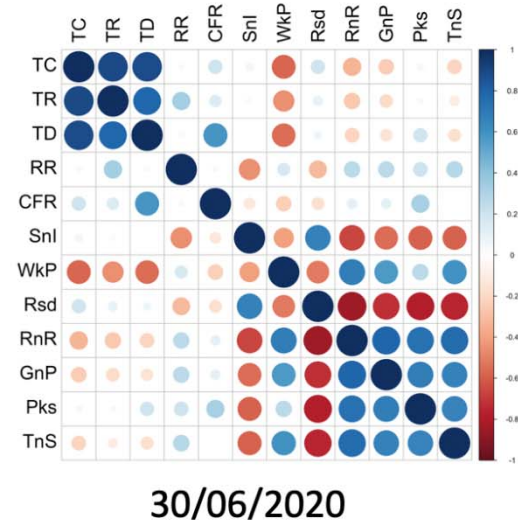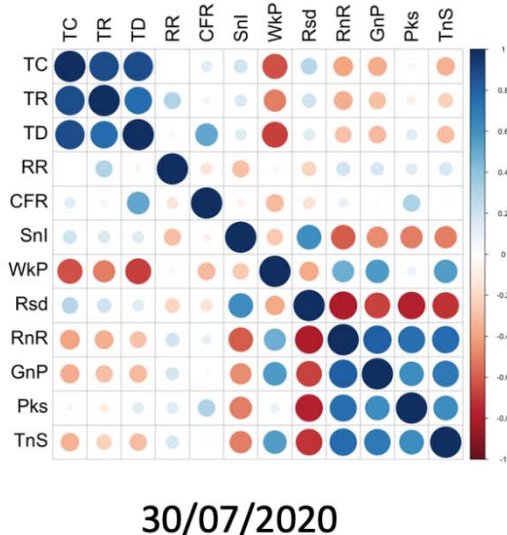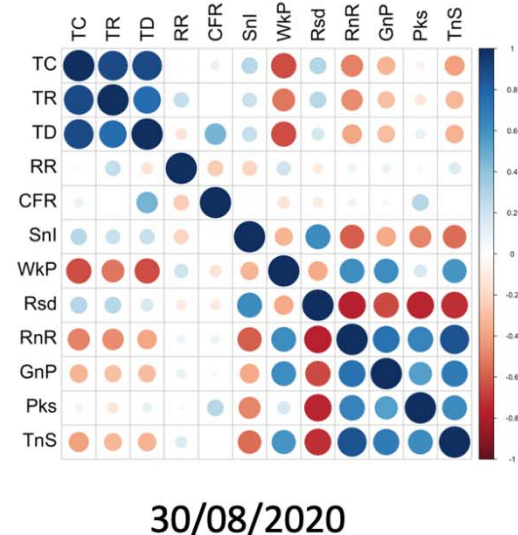

268 Fig 3. Correlogram from Spearman's correlation of Covid-19 indicators (n=5) and indicators of  
269 socio-economic situations (n=7) for countries (n=175) in the world (March-August, 2020).

#### 270 **4.3.1. Trends in Stringency and mobility - Covid-19 relationships:**

271 From the dendrogram (Suppl. Figure 3) of stringency-mobility-Covid-19, it is clearly visible that  
272 there have 2 distinct groups during the earlier stage of study (March-May 2020), one with case  
273 fatality and another with the rest (i.e. recovery, total confirmed, recovered and death). However,  
274 its nature has changed in the following months (June – August 2020), one group with case  
275 fatality and recovery and another group with the rest (i.e. total confirmed, recovered and death).

276 Mostly, the indicators of stringency and mobility conditions have not remained polarized in  
277 heatmap i.e., the nature and degree of correlation are changing with time.

278 The overall time wise (here, month) change of number of significantly correlated associations  
279 between Covid-19 and other 3 groups of indicators (viz. WASH, socioeconomic factors and  
280 stringency & mobility) are shown in Fig 4.

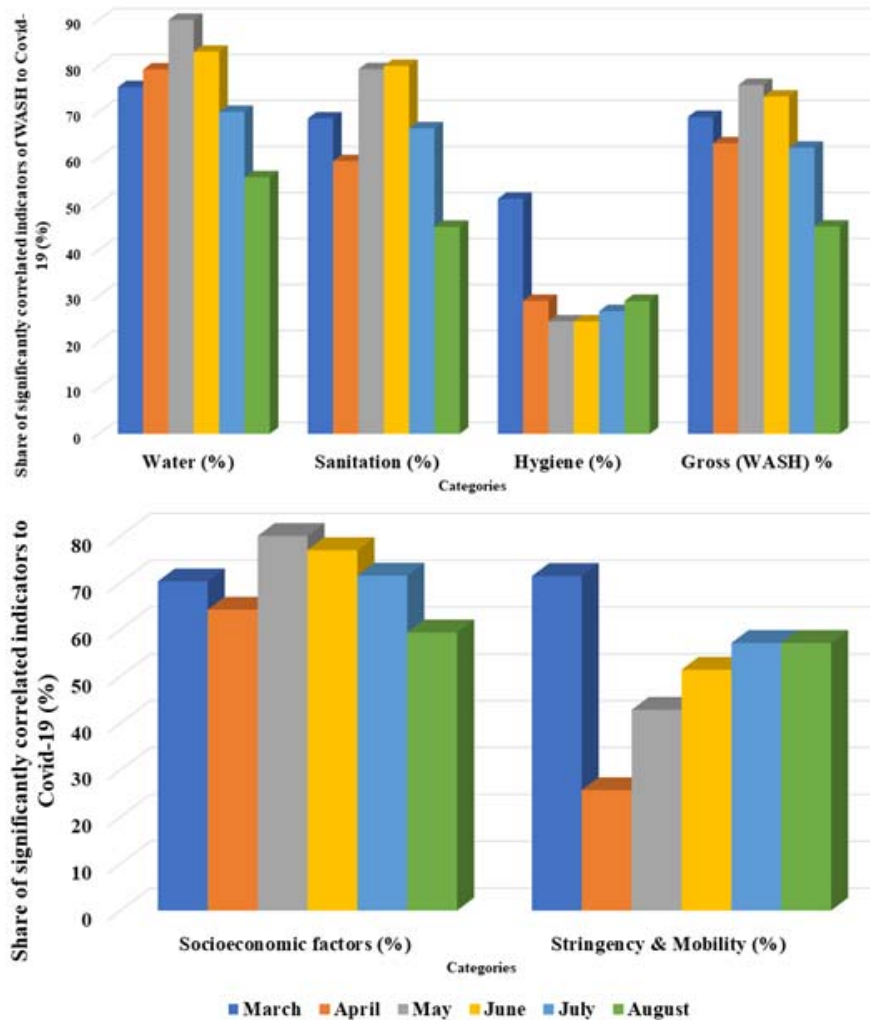

281

282 Fig 4. Temporal change (month wise) in the number of significantly correlated indicators in  
283 association with Covid-19 pandemic. (See Suppl. Table 6 for underlying data from calculation)

## 284 5. Discussion:

285 From this study, there are some basic understanding that can be inferred. For the WASH sphere,  
286 providing basic as well as improved drinking water, sanitation and hygiene facilities are directly  
287 positively connected to the recovery rate of Covid-19. Likewise, reducing unimproved drinking  
288 water, sanitation and open defecation is negatively connected to recovery rate. This means, not  
289 only for the specific domain of WASH but inclusive access to these facilities are also connected

290 to the health sector as well as disaster prevention (like – a pandemic connected to water). The  
291 hassle-free access of purified water (at least not associated to wastewater, Lapolla et al., 2020;  
292 Bogler et al, 2020) at home premises (Frumkin et al., 2020; Kassem and Jaafar, 2020; Staddon et  
293 al., 2020), access to improved sanitation facilities at household level as well as the availability of  
294 household hygiene measures (in form of soaps, hand sanitizers etc.) (Schmidt, 2020; Yu et al.,  
295 2020) have become the frontier force of precautionary prevention.

296 The other socio-economic factors also ascribe to similar perception regarding the covid-19  
297 pandemic. Among the health-related factors, better health security, a higher density of physicians  
298 and nurses, better life expectancy, higher per capita out of pocket expenditure and the lower  
299 crude death rate is positively associated with better recovery rate. These results are in line with  
300 Adams & Walls, 2020 (for healthcare workforce), Kandel et al., 2020 (for health security) etc.  
301 Among the economic factors, higher real GDP, connectedness, globalization and lower economic  
302 inequality are positively associated with a better rate of recovery. These outcomes are in line  
303 with Makridis & Hartley, 2020 (for real GDP), McKibbin & Fernando, 2020 (for  
304 macroeconomy) etc. Among the societal factors, higher literacy, social progress, democracy  
305 score, human capital and development along with lower unemployment, employment  
306 vulnerability and hunger are associated with better recovery. These findings are also in line with  
307 UNDP report (for human development), Khemraj & Yu, 2020 (for human capital), Kawohl &  
308 Nordt, 2020 (for unemployment) etc (see Fig 5).

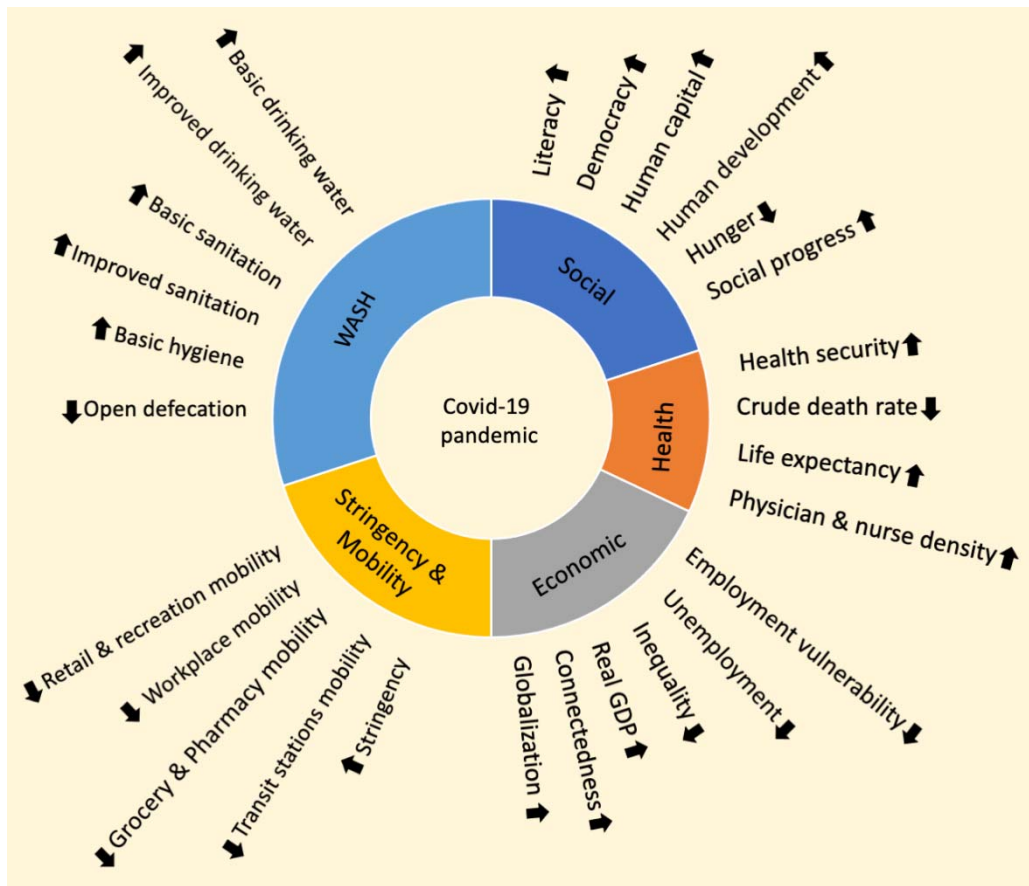

309

310 Fig 5. An overall global pandemic preparedness as well as mitigation actions that need to be  
311 given significance as the outcome established from this study.

312 This new pandemic has undoubtedly emphasised the frivolity of the present condition as well as  
313 the significance of the global WASH access system. These are the bare minimum requirements  
314 which have been either neglected or not properly implemented (sometimes due to lack of  
315 awareness). Other socioeconomic factors, though of varying degree, has a high level of  
316 correlation with various indicators of the covid-19 pandemic. This entails towards the  
317 importance of deliverance of socio-economic development globally.

318 There are some possible drawbacks in our work. Firstly, WASH data is from 2017, not  
319 immediate pre-pandemic data. It is because WHO-UNICEF JMP dataset is most robust and



320 uniform till date. However, recently, there have been some issues regarding the applicability of  
321 WASH data towards predicting the WASH-Covid19 relationship accurately (Quispe-Coica and  
322 Pérez-Foguet, 2020). But we don't have any better alternative. Second, the socio-economic  
323 indicators are also not of immediately pre-pandemic time (see Suppl. Table 5). This is due to the  
324 unavailability of the latest data (2019-20) for all of the socioeconomic indicators. Third, this  
325 analysis has not been done on the sub-national or lower scale. Because the objective was to  
326 understand the determinants of the covid-19 pandemic in general, for large scale. Also, the sub-  
327 national data are not comprehensive and uniformly available for all countries. Fourth, the study  
328 period (March-August 2020, i.e. 6 months) is odd. Though the onset and spread of covid-19  
329 pandemic are asymmetric for different countries, we think from March 2020 onwards, it had  
330 started in most of the major countries of the world. Also, we have taken 6 months (up to August  
331 2020) because the study also tries to understand and lingering association of determinants with  
332 Covid-19 pandemic, and as we can see from the data that this duration is long enough to serve  
333 the purpose. Lastly, we have chosen only one date (30<sup>th</sup> of each month) which is not continuous.  
334 We have taken nearly equidistant dates from each month as we think this is enough to give us a  
335 broad outline of the role of determinants.

336 We see whatever kind of association do the determining factors have with those of Covid-19, the  
337 degree is lessening through time (except – those related to mobility and stringency). This means  
338 two things, (a) other factors (which are outside the operational boundary of this study) might be  
339 getting superior control over the dynamics of Covid-19 than those included in this study, and/or  
340 (b) the data of aforementioned determinants are of pre-pandemic time, means they are not being  
341 updated daily or monthly (like – Covid-19). From this we can infer, these factors have been  
342 determining the trajectory of the covid-19 pandemic in the old normal (pre-pandemic) as well as

343 will continue to do so in the new normal (post-pandemic). We think once robust data are  
344 available of these determinants after the pandemic, we might see a similar level of association.

345 The present study has advocated the utility of interpreting determinants in epidemiological  
346 research, which can be diverse, with this Covid-19 pandemic as a case of example. The present  
347 work has explored the association between the WASH, social, demographic, mobility, economic  
348 as well as health parameters and Covid-19, extracting insightful tales of dynamics of Covid-19  
349 pandemic. Therefore, we hope, this study could be a reference for future health research and their  
350 controlling factors towards synthesizing a multidisciplinary approach for either prevention or  
351 control or both (Ross et al., 2020). Additionally, all the data used in this work are open source  
352 and freely available (we have also provided the raw data and results in supplement), in so doing,  
353 reproducibility, as well as scientific replicability, can be achievable.

## 354 **References**

- 355 Adams, J. G., Walls, R. M., 2020. Supporting the health care workforce during the Covid-19  
356 global epidemic. JAMA.; 323 (15):1439-1440. <https://doi.org/10.1001/jama.2020.3972>
- 357 Amankwaa, G., Fischer, C., 2020. Exploring the correlation between COVID-19 fatalities and  
358 poor WASH (Water, Sanitation and Hygiene) services. medRxiv,  
359 <https://doi.org/10.1101/2020.06.08.20125864>
- 360 Baena-Díez, J. M., Barroso, M., Cordeiro-Coelho, S. I., Díaz, J. L., Grau, M., 2020. Impact of  
361 COVID-19 outbreak by income: hitting hardest the most deprived. Journal of Public Health, 1–6.  
362 <https://doi.org/10.1093/pubmed/fdaa136>



- 363 Bogler, A., Packman, A., Furman, A., Gross, A., Kushmaro, A., Ronen, A.,...Morgenroth, E.,  
364 2020. Rethinking wastewater risks and monitoring in light of the COVID-19 pandemic. *Nature*  
365 *Sustainability*, 1–10. <https://doi.org/10.1038/s41893-020-00605-2>
- 366 Bolaño-Ortiz, T. R., Camargo-Cacedo, Y., Puliafito, S. E., Ruggeri, M. F., Bolaño-Diaz, S.,  
367 Pascual-Flores, R., Saturno, J., Ibarra-Espinosa, S., Mayol-Bracero, O. L., Torres- Delgado, E.,  
368 Cereceda-Balic, F., 2020. Spread of SARS-CoV-2 through Latin America and the Caribbean  
369 region: a look from its economic conditions, climate and air pollution indicators. *Environmental*  
370 *Research*, 191, 109938. <https://doi.org/10.1016/j.envres.2020.109938>
- 371 Brauer, M., Zhao, J. T., Bennitt, F. B., Stanaway, J. D., 2020. Global access to handwashing:  
372 implications for COVID-19 control in low-income countries. *Environmental Health*  
373 *Perspectives*, 128 (5), 1-9. <https://doi.org/10.1289/EHP7200>
- 374 Carlitz, R. D., Makhura, M. N., 2021. Life under lockdown: Illustrating tradeoffs in South  
375 Africa's response to COVID-19. *World Development*, 137, 105168.  
376 <https://doi.org/10.1016/j.worlddev.2020.105168>
- 377 Caruso, B. A., Freeman, M. C., 2020. Shared sanitation and the spread of COVID-19: risks and  
378 next steps. *Lancet Planetary Health*, 4 (5), e173. [https://doi.org/10.1016/S2542-5196\(20\)30086-3](https://doi.org/10.1016/S2542-5196(20)30086-3)
- 379 Castex, G., Dechter, E., Lorca, M., 2020. COVID-19: The impact of social distancing policies,  
380 cross-country analysis. *Economics of Disasters and Climate Change*,  
381 <https://doi.org/10.1007/s41885-020-00076-x>
- 382 Dowd, J. B., Andriano, L., Brazel, D. M., Rotondi, V., Block, P., Ding, X., Liu, Y., Mills, M. C.,  
383 2020. Demographic science aids in understanding the spread and fatality rates of COVID-19.  
384 *Proc. Natl. Acad. Sci.* 117, 18. <https://doi.org/10.1073/pnas.2004911117>

385 Ehlert, A., 2020. The socioeconomic determinants of COVID-19: A spatial analysis of German  
386 county level data. medRxiv, <https://doi.org/10.1101/2020.06.25.20140459>

387 Farzanegan, M. R., Gholipour, H. F., Feizi, M., Nunkoo, R., Andargoli, A. E., 2020.  
388 International Tourism and Outbreak of Coronavirus (COVID-19): A Cross-Country Analysis.  
389 Journal of Travel Research, 1–6, <https://doi.org/10.1177/0047287520931593>

390 Frumkin, H., Das, M. B., Negev, M., Rogers, B. C., Bertollini, R., Dora, C., Desai, S., 2020.  
391 Protecting health in dry cities: considerations for policy makers. BMJ; 371: m2936.  
392 <https://doi.org/10.1136/bmj.m2936>

393 Google, 2020. Google LLC "Google COVID-19 Community Mobility Reports". Available from  
394 <https://www.google.com/covid19/mobility/>

395 Gössling, S., Scott, D., Hall, C. M., 2020. Pandemics, tourism and global change: a rapid  
396 assessment of COVID-19. Journal of Sustainable Tourism, 29:1, 1-20.  
397 <https://doi.org/10.1080/09669582.2020.1758708>

398 Hale, T., Petherick, A., Phillips, T., Webster, S., 2020. Variation in Government Responses to  
399 COVID-19. BSG-WP-2020/032. Version 6.0. Blavatnik School of Government Working Paper.  
400 May 25, 2020. Available: [www.bsg.ox.ac.uk/covidtracker](http://www.bsg.ox.ac.uk/covidtracker)

401 Hatef, E., Chang, H. Y., Kitchen, C., Weiner, J. P., Kharrazi, H., 2020. Assessing the Impact of  
402 Neighborhood Socioeconomic Characteristics on COVID-19 Prevalence Across Seven States in  
403 the United States. Frontiers in Public Health, 8:571808.  
404 <https://doi.org/10.3389/fpubh.2020.571808>

405 Heller, L., Mota, C. R., Greco, D. B., 2020. COVID-19 faecal-oral transmission: Are we asking  
406 the right questions? *Science of the Total Environment*, 729, 138919.  
407 <https://doi.org/10.1016/j.scitotenv.2020.138919>

408 Holuka, C., Merz, M. P., Fernandes, S. B., Charalambous, E. G., Seal, S. V., Grova, N., Turner,  
409 J. D., 2020. The COVID-19 Pandemic: Does Our Early Life Environment, Life Trajectory and  
410 Socioeconomic Status Determine Disease Susceptibility and Severity? *International Journal of*  
411 *Molecular Sciences*, 21, 5094. <https://doi.org/10.3390/ijms21145094>

412 Jani, V., Mavalankar, D., 2020. COVID-19 and Socioeconomic Factors: Cross-country  
413 Evidence. medRxiv, <https://doi.org/10.1101/2020.10.22.20217430>

414 Jiwani, S. S., Antiporta, D. A., 2020. Inequalities in access to water and soap matter for the  
415 COVID-19 response in sub-Saharan Africa. *International Journal for Equity in Health*, 19:82.  
416 <https://doi.org/10.1186/s12939-020-01199-z>

417 Kandel, N., Chungong, S., Omaar, A., Xing, J., 2020. Health security capacities in the context of  
418 COVID-19 outbreak: an analysis of International Health Regulations annual report data from 182  
419 countries. *Lancet*, 395, 1047-1053. [https://doi.org/10.1016/S0140-6736\(20\)30553-5](https://doi.org/10.1016/S0140-6736(20)30553-5)

420 Kassem, I. I., Jaafar, H., 2020. The potential impact of water quality on the spread and control of  
421 COVID-19 in Syrian refugee camps in Lebanon, *Water International*,  
422 <https://doi.org/10.1080/02508060.2020.1780042>

423 Kawohl, W., Nordt, C., 2020. COVID-19, unemployment, and suicide. *Lancet Psychiatry*, 7 (5),  
424 389-390. [https://doi.org/10.1016/S2215-0366\(20\)30141-3](https://doi.org/10.1016/S2215-0366(20)30141-3)

- 425 Khemraj, T., Yu, S., 2020. Human capital and the COVID-19 pandemic. MPRA Paper 101262,  
426 University Library of Munich, Germany.
- 427 Lapointe, D., 2020. Reconnecting tourism after COVID-19: the paradox of alterity in tourism  
428 areas. *Tourism Geographies*, <https://doi.org/10.1080/14616688.2020.1762115>
- 429 Lapolla, P., Lee, R., Mingoli, A., 2020. Wastewater as a red flag in COVID-19 spread. *Public*  
430 *Health*, 185, 26. <https://doi.org/10.1016/j.puhe.2020.05.045>
- 431 Lau, L. S., Samari, G., Moresky, R. T., Casey, S. E., Kachur, S. P., Roberts, L. F., Zard, M.,  
432 2020. COVID-19 in humanitarian settings and lessons learned from past epidemics. *Nature*  
433 *Medicine*, <https://doi.org/10.1038/s41591-020-0851-2>
- 434 Makridis, C., Hartley, J., 2020. The Cost of COVID-19: A Rough Estimate of the 2020 U.S.  
435 GDP (March 22, 2020). <http://dx.doi.org/10.2139/ssrn.3559139>
- 436 McKibbin, W. J., Fernando, R., 2020. The Global Macroeconomic Impacts of COVID-19: Seven  
437 Scenarios (March 2, 2020). CAMA Working Paper No. 19/2020.  
438 <http://dx.doi.org/10.2139/ssrn.3547729>
- 439 Mishra, S.V., Gayen, A., Haque, S.M., 2020. COVID-19 and urban vulnerability in India.  
440 *Habitat International*, 103, 102230. <https://doi.org/10.1016/j.habitatint.2020.102230>
- 441 Mushi, V., Shao, M., 2020. Tailoring of the ongoing water, sanitation and hygiene interventions  
442 for prevention and control of COVID-19. *Tropical Medicine and Health*, 48:47.  
443 <https://doi.org/10.1186/s41182-020-00236-5>

444 Odith, E. E., Afolayan, A. O., Akintayo, I., Okele, I. N., 2020. Could Water and Sanitation  
445 Shortfalls Exacerbate SARS-CoV-2 Transmission Risks? American Journal of Tropical  
446 Medicine and Hygiene, 00(0), (1–4), <https://doi.org/10.4269/ajtmh.20-0462>

447 Quispe-Coica, A., Pérez-Foguet, A., 2020. Preprocessing alternatives for compositional data  
448 related to water, sanitation and hygiene. Science of the Total Environment, 743, 140519.  
449 <https://doi.org/10.1016/j.scitotenv.2020.140519>

450 R Core Team, 2019. R: A language and environment for statistical computing. R Foundation for  
451 Statistical Computing, Vienna, Austria. <https://www.R-project.org/>

452 Ross, A. G. P., Crowe, S. M., Tyndall, M. W., 2020. Planning for the Next Global Pandemic.  
453 International Journal of Infectious Diseases, 38, 89-94. <https://doi.org/10.1016/j.ijid.2015.07.016>

454 Roy, I., 2020. Viewpoint | Handwashing and COVID-19: Simple, right there...? World  
455 Development, 135: 105086. <https://doi.org/10.1016/j.worlddev.2020.105086>

456 Sa, F., 2020. Socioeconomic Determinants of Covid-19 Infections and Mortality: Evidence from  
457 England and Wales (May 2020). IZA Policy Paper No. 159, Available at SSRN:  
458 <https://ssrn.com/abstract=3612850>

459 Sahin, O., Salim, H., Suprun, E., Richards., R., MacAskill, S., Heilgeist, S., Rutherford, S.,  
460 Stewart, R. A., Beal, C. D., 2020. Developing a Preliminary Causal Loop Diagram for  
461 Understanding the Wicked Complexity of the COVID-19 Pandemic. Systems, 8 (2), 20.  
462 <https://doi.org/10.3390/systems8020020>

463 Sannigrahi, S., Pilla, F., Basu, B., Basu, A.S., Molter, A., 2020. Examining the Association  
464 Between Socio-demographic Composition and COVID-19 Fatalities in the European Region

465 Using Spatial Regression Approach. *Sustainable Cities and Society*, 62, 102418.  
466 <https://doi.org/10.1016/j.scs.2020.102418>

467 Schmidt, C. W., 2020. Lack of Handwashing Access: A Widespread Deficiency in the Age of  
468 COVID-19. *Environmental Health Perspectives*, <https://doi.org/10.1289/EHP7493>

469 Singh, L., Singh, N. S., Maldonado, B. N, Tweed, S., Blanchet, K., Graham, W. J., 2020. What  
470 does ‘leave no one behind’ mean for humanitarian crises-affected populations in the COVID-19  
471 pandemic? *BMJ Global Health*, 5: e002540. <https://doi.org/10.1136/bmjgh-2020-002540>

472 Staddon, C., Everard, M., Mytton, J., Octavianti, T., Powell, W., Quinn, N., Uddin, S. M. N.,  
473 Young, S. L., Miller, Budds, J. D., Geere, J., Meehan, K., Charles, K., Stevenson, E. G. J., Vonk,  
474 J., Mizniak, J., 2020. Water insecurity compounds the global coronavirus crisis, *Water*  
475 *International*, <https://doi.org/10.1080/02508060.2020.1769345>

476 Stoler, J., Jepson, W. E., Wutich, A., 2020. Beyond handwashing: Water insecurity undermines  
477 COVID-19 response in developing areas. *Journal of Global Health*, 10 (1), 010355.  
478 <https://doi.org/10.7189/jogh.10.010355>

479 UNDP, 2020. COVID-19 and Human Development: Assessing the Crisis, Envisioning the  
480 Recovery. Available from [http://hdr.undp.org/sites/default/files/covid-](http://hdr.undp.org/sites/default/files/covid-19_and_human_development_0.pdf)  
481 [19 and human development 0.pdf](http://hdr.undp.org/sites/default/files/covid-19_and_human_development_0.pdf)

482 UN-Habitat, 2020. UN-Habitat COVID-19 Response Plan 1–16.

483 UNICEF 2019. Progress on Household Drinking Water, Sanitation and Hygiene, 2000–2017:  
484 special Focus on Inequalities. [https://data.unicef.org/resources/progress-drinking-](https://data.unicef.org/resources/progress-drinking-watersanitation-hygiene-2019/)  
485 [watersanitation-hygiene-2019/](https://data.unicef.org/resources/progress-drinking-watersanitation-hygiene-2019/)

- 486 Varkey, R. S., Joy, J., Sarmah, G., Panda, P. K. 2020. Socioeconomic determinants of  
487 COVID-19 in Asian countries: An empirical analysis. Journal of Public Affairs, e2532.  
488 <https://doi.org/10.1002/pa.2532>
- 489 Weinstein, B., da Silva, A. R., Kouzoukas, D. E., Bose, T., Kim, G. J., Correa, P. A., Pondugula,  
490 S., Kim, J., Carpenter, D. O., 2020. A methodological blueprint to identify COVID-19  
491 vulnerable locales by socioeconomic factors, developed using South Korean data. medRxiv,  
492 <https://doi.org/10.1101/2020.10.26.20218842>
- 493 WHO, 2020a. Water, sanitation, hygiene and waste management for COVID-19. Technical brief.  
494 [https://www.who.int/publications/i/item/water-sanitation-hygiene-and-wastemanagement-for-](https://www.who.int/publications/i/item/water-sanitation-hygiene-and-wastemanagement-for-covid-19)  
495 [covid-19](https://www.who.int/publications/i/item/water-sanitation-hygiene-and-wastemanagement-for-covid-19)
- 496 WHO, 2020b. State of the World's Sanitation: An urgent call to transform sanitation for better  
497 health, environments, economies and societies. New York.
- 498 WHO/UNICEF JMP (WHO/UNICEF Joint Monitoring Programme for Water Supply, Sanitation  
499 and Hygiene). 2020. <https://washdata.org/>
- 500 Xiong, Y., Wang, Y., Chen, F., Zhu, M., 2020. Spatial statistics and influencing factors of the  
501 COVID-19 epidemic at both prefecture and county levels in Hubei Province. China. Int. J.  
502 Environ. Res. Public Health 17. <https://doi.org/10.3390/ijerph17113903>
- 503 Yang, C., Sha, D., Liu, Q., Li, Y., Lan, H., Guan, W. W., Hu, T., Li, Z., Zhang, Z., Thompson, J.  
504 H., Wang, Z., Wong, D., Ruan, S., Yu, M., Richardson, D., Zhang, L., Hou, R., Zhou, Y., Zhong,  
505 C., Tian, Y., Beaini, F., Carte, K., Flynn, C., Liu, W., Pfoser, D., Bao, S., Li, M., Zhang, H., Liu,  
506 C., Jiang, J., Du, S., Zhao, L., Lu, M., Li, L., Zhou, H., Ding, A., 2020. Taking the pulse of

507 COVID-19: a spatiotemporal perspective. *International Journal of Digital Earth*, 13: 10, 1186-  
508 1211. <https://doi.org/10.1080/17538947.2020.1809723>

509 Yu, W., Bain, R. E. S., Yu, J., Alegana, V., Dotse-Gborgbortsi, W., Lin, Y., Wright, J. A., 2020.  
510 Mapping access to basic hygiene services in low- and middle-income countries: A cross-  
511 sectional case study of geospatial disparities. medRxiv,  
512 <https://doi.org/10.1101/2020.08.07.20169995>
